# Supplementary material for: Reviews and syntheses: Soil N 2 O and NO emissions from land use and land-use change in the tropics and subtropics: a meta-analysis
Source: Copernicus journal article supplement (doi:10.5194/bg-12-7299-2015), 2015-12-14
Supplement: Supplementary file 1 [file bg-12-7299-2015-supplement.zip]

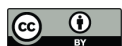

## *Supplement of*

# **Reviews and syntheses: Soil N<sub>2</sub>O and NO emissions from land use and land-use change in the tropics and subtropics: a meta-analysis**

**J. van Lent et al.**

*Correspondence to:* J. van Lent ([j.lent@cgiar.org](mailto:j.lent@cgiar.org))

- [bg-12-7299-2015-supplement-title-page.pdf](#)
- [S1 database LU.xls](#)
- [S2 database LUC.xls](#)

The copyright of individual parts of the supplement might differ from the CC-BY 3.0 licence.
